# Supplementary material for: A modern automated patch-clamp approach for high throughput electrophysiology recordings in native cardiomyocytes
Source: PubMed Central journal article supplement (PMC9477872; doi:10.1038/s42003-022-03871-2), 2022-09-15
Supplement: 42003_2022_3871_MOESM3_ESM.pdf [file 42003_2022_3871_MOESM3_ESM.pdf]

## **Description of Additional Supplementary Files**

**File name:** Supplementary Video 1.

**Description:** Multi-current Calcium, Action Potential and inward rectifier (CAPER) results from atrial cardiomyocytes in three dimensions.

**File Name:** Supplementary Data 1

**Description:** Source data behind graphs in the paper
